# Supplementary material for: Dependence of coupling of quasi 2-D MoS2 with substrates on substrate types, probed by temperature dependent Raman scattering
Source: Royal Society of Chemistry journal article supplement (doi:10.1039/c3nr06462j), 2014-01-01
Supplement: c3nr06462j1.pdf [file c3nr06462j1.pdf]

Electronic Supplementary Information for  
“Dependence of Coupling of Quasi 2-D MoS<sub>2</sub>  
with Substrate on substrate type, Probed by  
Temperature Dependent Raman Scattering”

*Liqin Su,<sup>1</sup> Yong Zhang,<sup>1</sup> Yifei Yu,<sup>2</sup> and Linyou Cao<sup>2</sup>*

<sup>1</sup> Electrical and Computer Engineering Department, University of North Carolina at  
Charlotte, Charlotte, NC 28223, USA.

<sup>2</sup> Department of Materials Science and Engineering, North Carolina State University,  
Raleigh, NC 27695, USA.

In addition to the sample (1L-ME-SiO<sub>2</sub>) used in the main text, two other mechanically exfoliated 1L MoS<sub>2</sub> samples on SiO<sub>2</sub>/Si substrate were also studied (labeled as 1L-ME-SiO<sub>2</sub>-No2 and 1L-ME-SiO<sub>2</sub>-No3), yielding qualitatively very similar results. Figures S1 and S2, respectively, show the optical image, Raman spectrum, Frequency difference between  $E_{2g}^1$  and  $A_{1g}$  modes, and temperature dependence of Raman frequency and FWHM (Full Width at Half Maximum) of  $E_{2g}^1$  and  $A_{1g}$  modes for these two samples.

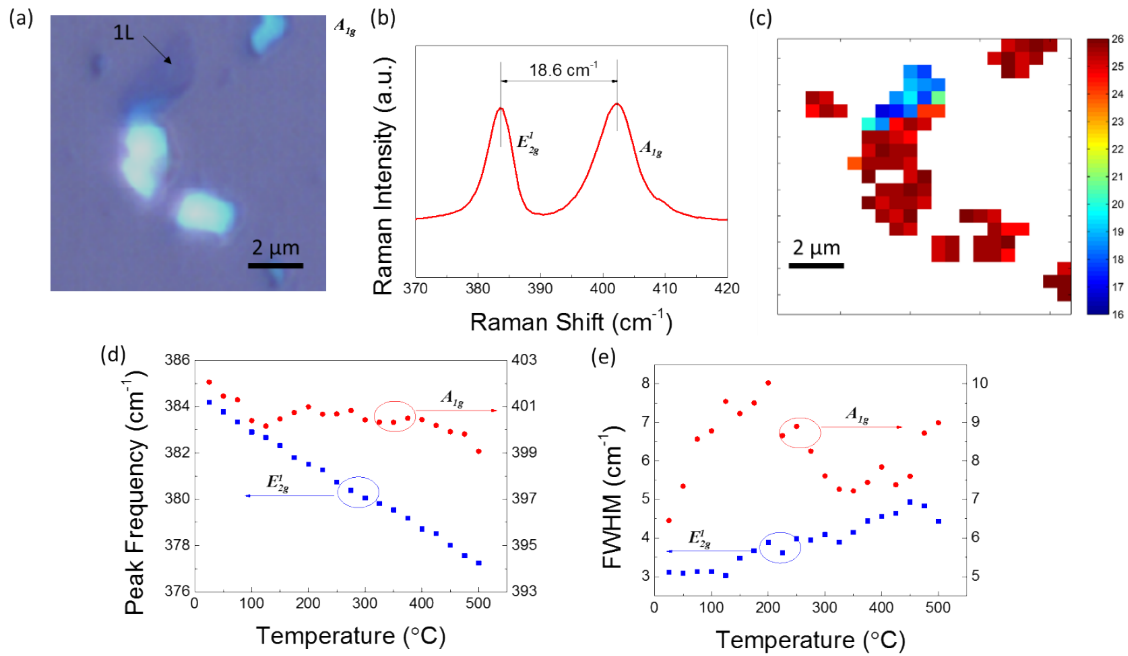

**Figure S1.** 1L-ME-SiO<sub>2</sub>-No2. (a) Optical image of a few flakes of MoS<sub>2</sub> with different thickness, including the one named as 1L-ME-SiO<sub>2</sub>-No2. (b) A Raman spectrum of 1L-ME-SiO<sub>2</sub>-No2, with the frequency difference between  $E_{2g}^1$  and  $A_{1g}$  being 18.6 cm<sup>-1</sup> (indicating single layer). (c) Map of Raman frequency difference between  $E_{2g}^1$  and  $A_{1g}$  modes for all the pieces. (d) and (e) Temperature dependence of Raman frequency and FWHM for  $E_{2g}^1$  and  $A_{1g}$  in 1L-ME-SiO<sub>2</sub>-No2.

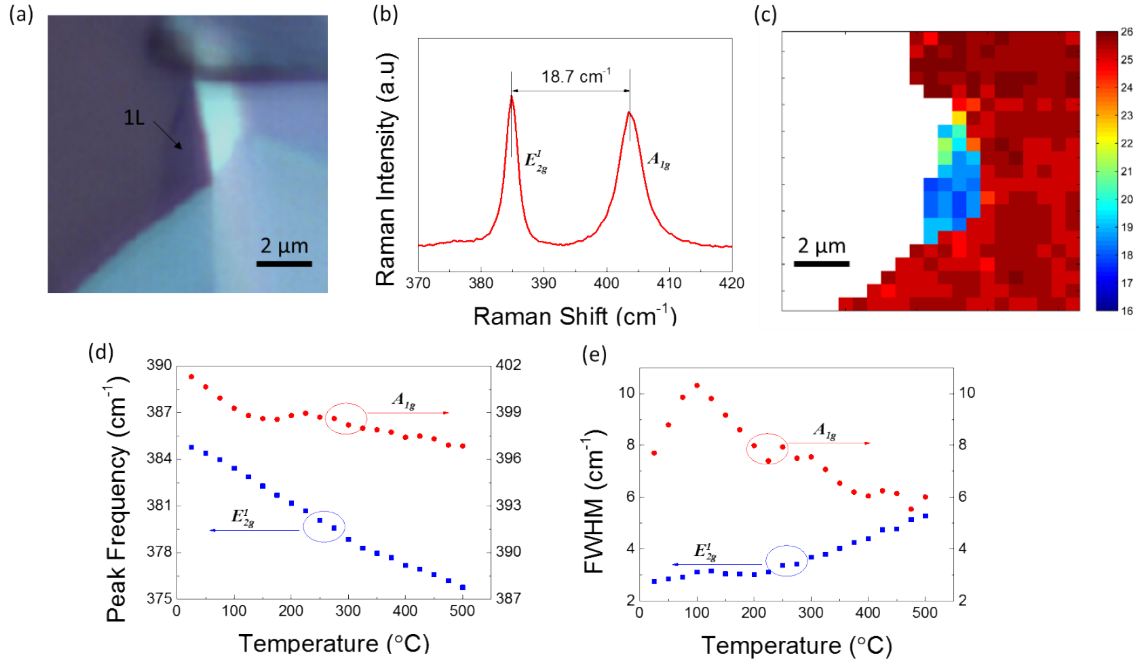

**Figure S2.** 1L-ME-SiO<sub>2</sub>-No3. (a) Optical image of a large piece of MoS<sub>2</sub> with one portion being 1ML thick, named as 1L-ME-SiO<sub>2</sub>-No3. (b) A Raman spectrum of 1L-ME-SiO<sub>2</sub>-No3, with the frequency difference between  $E_{2g}^1$  and  $A_{1g}$  being 18.6 cm<sup>-1</sup> (indicating single layer). (c) Map of Raman frequency difference between  $E_{2g}^1$  and  $A_{1g}$  modes for all the pieces. (d) and (e) Temperature dependence of Raman frequency and FWHM for  $E_{2g}^1$  and  $A_{1g}$  in 1L-ME-SiO<sub>2</sub>-No3.

The Raman spectra, as well as the maps of Raman frequency difference between  $E_{2g}^1$  and  $A_{1g}$  modes, of both samples indicate that they are single-layer MoS<sub>2</sub> films. Raman mappings were carried out for both samples at room temperature, showing that at single-layer area the Raman frequency variation of  $A_{1g}$  mode is greater than that of  $E_{2g}^1$  mode, which further confirms that  $A_{1g}$  mode is more sensitive to the film morphology variation that was introduced during pressing down the exfoliated thin-film. The temperature dependences of both  $E_{2g}^1$  and  $A_{1g}$  modes were performed in the temperature range from room temperature (25 °C) to 500 °C (Figure S1(d) and S2(d)). The  $E_{2g}^1$  mode exhibits a

close to linear temperature dependence with increasing temperature, while the  $A_{1g}$  mode shows strong nonlinearity, which is consistent with sample 1L-ME-SiO<sub>2</sub>. The nonlinear temperature dependence of  $A_{1g}$  mode is attributed to the morphology changes such as the wrinkles and ripples with increasing temperature. The first-order temperature coefficients of the  $E_{2g}^1$  and  $A_{1g}$  modes are  $-0.0182 \pm 0.0013$  cm<sup>-1</sup>/K and  $-0.0240 \pm 0.0048$  cm<sup>-1</sup>/K for 1L-ME-SiO<sub>2</sub>-No2 sample, and  $-0.0170 \pm 0.0019$  cm<sup>-1</sup>/K and  $-0.0310 \pm 0.0050$  cm<sup>-1</sup>/K for 1L-ME-SiO<sub>2</sub>-No3 sample, respectively. These values are also in a good agreement with the results in the main text for 1L-ME-SiO<sub>2</sub>. Furthermore, the temperature dependence of FWHM of the  $E_{2g}^1$  mode is also more linear than the  $A_{1g}$  mode for both samples (Figure S1(e) and S2(e)).
